# Supplementary material for: On process-based granular reconstruction of life cycle inventories: sustainably coherent planning of primary battery-grade nickel
Source: Research Square preprint supplement (doi:10.21203/rs.3.rs-5639090/v1), 2024-12-19
Supplement: Supplementary file 1 [file 159a8976c3f0e3c8256e50c5.pdf]

## Supplementary information S1 : Detailed life cycle inventories of nickel processing pathways

For each processing pathway derived from environmental reports and simulations, the following data is provided:

1. Parameters used for the scaling of the mining and beneficiation inventory as well as allocation
2. Inventory used in OpenLCA, with background information from the ecoinvent v.3.9.1 database
3. Detailed (percentage and absolute) contribution analysis of climate impacts

Then, supporting data and underlying data of each figure in the research article is presented for reproduction.

### Contents

|                                                                                    |    |
|------------------------------------------------------------------------------------|----|
| S1.1 Inventory modelling for POX leaching processing of sulfide ores .....         | 2  |
| S1.2 Inventory modelling for HPAL processing of laterite ores .....                | 4  |
| S1.3 Inventory modelling for bioheap leaching processing of sulfide ores .....     | 8  |
| S1.4 Inventory modelling for the bioleaching of sulfidic tailings.....             | 11 |
| S1.5 Inventory modelling for the pyrometallurgical treatment of sulfide ores ..... | 13 |
| S1.6 Inventory modelling for RKEF processing of laterite ores .....                | 15 |
| S1.7 Underlying data of figures .....                                              | 17 |

### List of tables

|                                                                                                                                    |    |
|------------------------------------------------------------------------------------------------------------------------------------|----|
| Table 1: Parameters utilized for the scaling of the mining and beneficiation inventory for POX leaching .....                      | 2  |
| Table 2: Inventory for POX leaching of 19% Ni concentrate and refining to nickel metal .....                                       | 2  |
| Table 3: Contribution analysis of climate impacts for POX leaching processing route .....                                          | 4  |
| Table 4: Parameters utilized for the scaling of the mining and beneficiation inventory for HPAL processing .....                   | 4  |
| Table 5: HPAL processing route life cycle inventory – sulfur burning flowsheet.....                                                | 4  |
| Table 6: Tailings impoundment model for HPAL residues .....                                                                        | 5  |
| Table 7: Contribution analysis of climate impacts for HPAL processing route –sulfur burning flowsheet .....                        | 7  |
| Table 8 : Changes to the concentrate processing inventory for the HPAL-coal variant.....                                           | 8  |
| Table 9: Contribution analysis of climate impacts for HPAL processing route – coal-powered flowsheet .....                         | 8  |
| Table 10: Parameters utilized for the modelling of the mining and beneficiation inventory for bioheap leaching .....               | 9  |
| Table 11: Inventory for bioheap leaching processing route .....                                                                    | 9  |
| Table 12: Contribution analysis for bioheap leaching of sulfide ores .....                                                         | 11 |
| Table 13: Mass allocation for bioleaching of tailings .....                                                                        | 11 |
| Table 14: Inventory for tailings bioleaching processing route .....                                                                | 11 |
| Table 15: Contribution analysis for bioleaching of sulfidic tailings .....                                                         | 13 |
| Table 16: Parameters utilized for the scaling of the material mining and beneficiation inventory for flash smelting .....          | 13 |
| Table 17: Inventory for flash smelting of sulfide ores and ammoniacal hydrogen precipitation to nickel metal.....                  | 13 |
| Table 18: Contribution analysis for the flash smelting of sulfide ores up to nickel sulfate.....                                   | 14 |
| Table 19: Contribution analysis of the smelting and refining of sulfide concentrate to nickel sulfate inventory in ecoinvent ..... | 15 |
| Table 20: Parameters utilized for the scaling of the mining and beneficiation inventory .....                                      | 15 |
| Table 21: RKEF processing route life cycle inventory .....                                                                         | 16 |
| Table 22: Contribution analysis of climate impacts for RKEF processing route .....                                                 | 17 |
| Table 23: Underlying data of Figure 3 .....                                                                                        | 17 |
| Table 24: Underlying data of Figure 4 .....                                                                                        | 17 |
| Table 25: Underlying data of Figure 4 in percentage form .....                                                                     | 18 |
| Table 26: Underlying data of Figure 5 .....                                                                                        | 19 |
| Table 27: Underlying data of Figure 5 in percentage form .....                                                                     | 19 |
| Table 28: Equivalent distances supporting the discussion in Results section 3.4 .....                                              | 20 |
| Table 29: Underlying data of Figure 6's subplots.....                                                                              | 20 |
| Table 30: IMPACT WORLD+ v.1.29 midpoint results.....                                                                               | 21 |

Figure S 1: Alternative to Figure 6, using version 2.01 of IMPACT WORLD+. ....

Figure S 2: Alternative to Figure 6, using ReCiPe 2016(H) impact assessment method. ....

### S1.1 Inventory modelling for POX leaching processing of sulfide ores

Scaling of the reference mining and beneficiation inventory data was performed using the parameters described in Table 1.

To provide a better estimate for comminution energy requirements during beneficiation, the electricity demand was estimated with the Bond equation <sup>1</sup>. The estimation is based on the difference between the particle size of the feed (F80) and product streams (P80).

$$E_{Bond} = WI \left( \frac{10}{\sqrt{P80}} - \frac{10}{\sqrt{F80}} \right) \quad \text{Equation S1}$$

The electrical requirement (kWh/tonne) is also a function of a proprietary parameter of the ore, the bond grinding work index (WI), which is ~15 kWh/tonne for sulphide ores. When unspecified, F80 is set to default values of 5000 µm, and P80 to 75 µm for sulphide ores comminution <sup>1</sup>.

Parameters passed to the Bond equation to compute comminution electricity requirements are also listed in Table 1.

Table 1: Parameters utilized for the scaling of the mining and beneficiation inventory for POX leaching

| Parameters                     | Reference inventory | Scaled inventory   | Precisions                                                                                                |
|--------------------------------|---------------------|--------------------|-----------------------------------------------------------------------------------------------------------|
| Strip ratio (S)                | 2.67 <sup>2</sup>   |                    | Obtained from the process model for nickel mine operation and beneficiation to nickel concentrate, 16% Ni |
| $x_{Ni,ore}$                   | 2.80% <sup>3</sup>  | 2.83% <sup>4</sup> |                                                                                                           |
| $m_{Ni,concentrate}$           | 16% <sup>2</sup>    | 19% <sup>5</sup>   |                                                                                                           |
| $m_{rock}/m_{concentrate}$     | 26.5 <sup>2</sup>   | 22.1               | For the scaled inventory: calculated from Equation 3 (main manuscript)                                    |
| $m_{concentrate}/m_{Ni,final}$ | -                   | 5.38 <sup>5</sup>  |                                                                                                           |
| P80 (µm)                       | -                   | 20 <sup>6</sup>    |                                                                                                           |
| F80 (µm)                       | -                   | 5000 <sup>1</sup>  |                                                                                                           |

The inventory for POX leaching is obtained on a kg Ni<sub>eq</sub> basis via a mass allocation factor of 89% to nickel, due to co-production of copper (7%) and cobalt (4%)<sup>5</sup>.

Table 2: Inventory for POX leaching of 19% Ni concentrate and refining to nickel metal

| Flow                                                 | Amount      | Unit      | Provider/Description                                                                                             |
|------------------------------------------------------|-------------|-----------|------------------------------------------------------------------------------------------------------------------|
| <b>Inputs</b>                                        |             |           |                                                                                                                  |
| <b>Concentrate processing to nickel metal</b>        |             |           |                                                                                                                  |
| <b>nickel concentrate, 19% Ni</b>                    | <b>4.79</b> | <b>kg</b> | <b>nickel mine operation and beneficiation to nickel concentrate, 16% Ni, scaled for POX leaching processing</b> |
| boric acid, anhydrous, powder                        | 4.60E-03    | kg        | market for boric acid, anhydrous, powder   GLO                                                                   |
| cationic resin                                       | 2.20E-04    | kg        | market for cationic resin   RoW                                                                                  |
| chemical, organic (proxy for Cyanex 272)             | 5.00E-05    | kg        | market for chemical, organic   GLO                                                                               |
| chemical, organic (proxy for sodium laurel sulphate) | 9.00E-05    | kg        | market for chemical, organic   GLO                                                                               |
| chemical, organic (proxy for DEPHA)                  | 2.00E-04    | kg        | market for chemical, organic   GLO                                                                               |
| chemical, organic (proxy for LIX 84)                 | 6.00E-04    | kg        | market for chemical, organic   GLO                                                                               |
| chemical, organic (proxy for sodium lignosulphonate) | 0.12        | kg        | market for chemical, organic   GLO                                                                               |
| electricity, high voltage                            | 11.43       | kWh       | electricity, high voltage, production mix   CA-NF                                                                |

|                                                                       |          |                |                                                                                                                           |
|-----------------------------------------------------------------------|----------|----------------|---------------------------------------------------------------------------------------------------------------------------|
| heat, district or industrial, other than natural gas (light fuel oil) | 0.02     | MJ             | heat production, light fuel oil, at industrial furnace 1MW   heat, district or industrial, other than natural gas   CA-QC |
| heat, district or industrial, other than natural gas (diesel)         | 0.32     | MJ             | heat production, light fuel oil, at industrial furnace 1MW   heat, district or industrial, other than natural gas   CA-QC |
| hydrochloric acid, without water, in 30% solution state               | 0.15     | kg             | market for hydrochloric acid, without water, in 30% solution state   RoW                                                  |
| kerosene                                                              | 3.82E-03 | kg             | market for kerosene   RoW                                                                                                 |
| limestone, crushed, washed                                            | 2.15     | kg             | market for limestone, crushed, washed   Row                                                                               |
| oxygen, liquid                                                        | 2.74     | kg             | air separation, cryogenic   oxygen, liquid   CA-NF                                                                        |
| Polyacrylamide (proxy for flocculants)                                | 0.01     | kg             | market for polyacrylamide   GLO                                                                                           |
| soda ash, dense                                                       | 0.20     | kg             | market for soda ash, dense   soda ash, dense   GLO                                                                        |
| sodium chloride, powder                                               | 0.02     | kg             | market for sodium chloride, powder   GLO                                                                                  |
| sodium hydrogen sulfite (proxy for sodium metabisulphite)             | 0.02     | kg             | market for sodium hydrogen sulfite   GLO                                                                                  |
| sodium hydrosulfide                                                   | 0.02     | kg             | market for sodium hydrosulfide   GLO                                                                                      |
| sodium hydroxide, without water, in 50% solution state                | 0.01     | kg             | market for sodium hydroxide, without water, in 50% solution state   GLO                                                   |
| sulfuric acid                                                         | 0.62     | kg             | market for sulfuric acid   RoW                                                                                            |
| Water, unspecified natural origin, CA                                 | 0.08     | m <sup>3</sup> |                                                                                                                           |
| <b>Outputs</b>                                                        |          |                |                                                                                                                           |
| <b>Nickel equivalent</b>                                              | <b>1</b> | <b>kg</b>      |                                                                                                                           |
| Carbon dioxide                                                        | 1.50E-03 | kg             | Elementary flows/Emission to air/unspecified                                                                              |
| Chlorine                                                              | 7.00E-07 | kg             | Elementary flows/Emission to air/unspecified                                                                              |
| Cobalt II                                                             | 1.00E-05 | kg             | Elementary flows/Emission to air/unspecified                                                                              |
| Copper ion                                                            | 3.00E-05 | kg             | Elementary flows/Emission to air/unspecified                                                                              |
| Hydrogen chloride                                                     | 2.70E-04 | kg             | Elementary flows/Emission to air/unspecified                                                                              |
| Iron ion                                                              | 8.00E-05 | kg             | Elementary flows/Emission to air/unspecified                                                                              |
| Kerosene                                                              | 5.00E-09 | kg             | Elementary flows/Emission to air/unspecified                                                                              |
| Lead II                                                               | 1.25E-06 | kg             | Elementary flows/Emission to air/unspecified                                                                              |
| Manganese II                                                          | 3.56E-06 | kg             | Elementary flows/Emission to air/unspecified                                                                              |
| Nickel refinery dust                                                  | 1.80E-04 | kg             | Elementary flows/Emission to air/unspecified                                                                              |
| Nitrogen oxides                                                       | 1.67E-03 | kg             | Elementary flows/Emission to air/unspecified                                                                              |
| Particulates                                                          | 1.71E-03 | kg             | Elementary flows/Emission to air/unspecified                                                                              |
| sodium carbonate                                                      | 1.80E-04 | kg             | Elementary flows/Emission to air/unspecified                                                                              |
| Sulfur dioxide                                                        | 3.77E-03 | kg             | Elementary flows/Emission to air/unspecified                                                                              |
| Sulfuric acid                                                         | 1.30E-04 | kg             | Elementary flows/Emission to air/unspecified                                                                              |

The inventory for nickel metal is used as a provider for the ecoinvent v.3.9.1 nickel sulfate production process model, using electricity, high voltage, production mix | CA-NF. We neglect the contribution of the market for a chemical factory (0.15 kgCO<sub>2eq</sub>/kg Ni<sub>eq</sub> or 3% of the overall impacts) in the nickel sulfate process model, for a fair comparison with the other process-based inventories in this study which do not retain this level of detail.

Table 3: Contribution analysis of climate impacts for POX leaching processing route

| supply chain step         | contributor                       | kgCO <sub>2eq</sub> /<br>kg Ni <sub>eq</sub> | %      |
|---------------------------|-----------------------------------|----------------------------------------------|--------|
| Mining                    | Mobile equipment energy           | 0.77                                         | 16.0%  |
| Mining                    | Explosives                        | 0.10                                         | 2.1%   |
| Mining                    | Cement                            | 0.67                                         | 14.0%  |
| Mining                    | Other (EG, lubricating oil, sand) | 0.15                                         | 3.2%   |
| Beneficiation             | Flotation chemicals               | 0.20                                         | 4.1%   |
| Beneficiation             | Electricity for grinding          | 7.21E-02                                     | 1.5%   |
| Concentrate processing    | Hydromet chemicals                | 1.20                                         | 24.8%  |
| Concentrate processing    | Electricity for hydromet plant    | 0.91                                         | 18.9%  |
| Concentrate processing    | Thermal energy for hydromet plant | 0.03                                         | 0.7%   |
| Concentrate processing    | Hydromet process emissions        | 0.0015                                       | 0.0%   |
| Nickel sulfate conversion | Sulfuric acid                     | 0.30                                         | 6.1%   |
| Nickel sulfate conversion | Thermal energy                    | 0.33                                         | 6.9%   |
| Nickel sulfate conversion | Electricity                       | 0.08                                         | 1.7%   |
| Sum                       |                                   | 4.83                                         | 100.0% |

## S1.2 Inventory modelling for HPAL processing of laterite ores

Scaling of the disaggregated contribution data was performed using the parameters described in Table 4.

Table 4: Parameters utilized for the scaling of the mining and beneficiation inventory for HPAL processing

| Parameters                       | Reference inventory | Scaled inventory   | Precisions                                   |
|----------------------------------|---------------------|--------------------|----------------------------------------------|
| <i>Strip ratio (S)</i>           | 1 <sup>7</sup>      |                    |                                              |
| $x_{Ni,ore}$                     | 1.30% <sup>7</sup>  | 1.22% <sup>8</sup> |                                              |
| $\eta_{beneficiation}$           | 1 <sup>7</sup>      |                    |                                              |
| $\eta_{concentrate\ processing}$ | 95.0% <sup>7</sup>  |                    |                                              |
| $\eta_{refining}$                | 99.5% <sup>2</sup>  |                    |                                              |
| $m_{rock}/m_{Ni,final}$          | 162.8               | 173.5              | Calculated from Equation 2 (main manuscript) |
| $m_{concentrate}/m_{Ni,final}$   | 81.4                | 86.7               | Calculated from Equation 5 (main manuscript) |

Table 5: HPAL processing route life cycle inventory – sulfur burning flowsheet

| Inputs                                                 |              |                   |                                                              |
|--------------------------------------------------------|--------------|-------------------|--------------------------------------------------------------|
| Flow                                                   | Amount       | Unit              | Provider/Description                                         |
| <b>Mining and beneficiation</b>                        |              |                   |                                                              |
| blasting                                               | 0.02         | kg                | market for blasting   GLO                                    |
| diesel, burned in building machine                     | 12.86        | MJ                | diesel, burned in building machine   GLO                     |
| diesel, burned in diesel-electric generating set, 10MW | 3.39         | MJ                | diesel, burned in diesel-electric generating set, 10MW   GLO |
| <b>Laterite ore</b>                                    | <b>86.74</b> | <b>kg</b>         |                                                              |
| Occupation, industrial area, ID                        | 0.06         | m <sup>2</sup> *a |                                                              |
| Transformation, to industrial area, ID                 | 0.06         | m <sup>2</sup>    |                                                              |

|                                                        |       |                |                                                                              |
|--------------------------------------------------------|-------|----------------|------------------------------------------------------------------------------|
| Aluminium                                              | 2.58  | kg             | Resource / in ground                                                         |
| Calcium                                                | 0.04  | kg             | Resource / in ground                                                         |
| Chromium                                               | 1.99  | kg             | Resource / in ground                                                         |
| Cobalt                                                 | 0.18  | kg             | Resource / in ground                                                         |
| Iron                                                   | 39.05 | kg             | Resource / in ground                                                         |
| Magnesium                                              | 0.80  | kg             | Resource / in ground                                                         |
| Manganese                                              | 1.02  | kg             | Resource / in ground                                                         |
| Nickel                                                 | 1.06  | kg             | Resource / in ground                                                         |
| <b>Beneficiation</b>                                   |       |                |                                                                              |
| electricity, high voltage                              | 1.65  | kWh            | electricity production, hard coal   RoW                                      |
| <b>Concentrate processing to MHP</b>                   |       |                |                                                                              |
| lime, packed                                           | 4.00  | kg             | market for lime, packed   RoW                                                |
| limestone, crushed, washed                             | 15.00 | kg             | market for limestone, crushed, washed   RoW                                  |
| magnesium oxide                                        | 2.50  | kg             | market for magnesium oxide   GLO                                             |
| sulfur                                                 | 11.00 | kg             | sulfur production, petroleum refinery operation   RoW                        |
| Water, unspecified natural origin, ID                  | 0.16  | m <sup>3</sup> |                                                                              |
| <b>Nickel sulfate refining</b>                         |       |                |                                                                              |
| electricity, high voltage                              | 2.82  | kWh            | electricity production, hard coal   RoW                                      |
| heat, district or industrial, natural gas              | 2.00  | MJ             | market group for heat, district or industrial, natural gas   GLO             |
| sodium hydroxide, without water, in 50% solution state | 0.36  | kg             | market for sodium hydroxide, without water, in 50% solution state   GLO      |
| sulfuric acid                                          | 2.91  | kg             | market for sulfuric acid   RoW                                               |
| Water, unspecified natural origin, ID                  | 0.01  | m <sup>3</sup> |                                                                              |
| <b>Outputs</b>                                         |       |                |                                                                              |
| Carbon dioxide                                         | 6.6   | kg             | Direct CO <sub>2</sub> emissions from limestone for Fe/Al removal            |
| Carbon dioxide                                         | 0.06  | kg             | Process CO <sub>2</sub> emissions for nickel sulfate conversion              |
| <b>Tailings</b>                                        | 96.28 | kg             | Tailings impoundment model for nickel-bearing laterite, from HPAL, Indonesia |
| <b>Nickel equivalent</b>                               | 1     | kg             |                                                                              |

Table 6: Tailings impoundment model for HPAL residues

| Flow                             | Category                                                   | Amount      | Unit              |
|----------------------------------|------------------------------------------------------------|-------------|-------------------|
| <b>Disposal of HPAL tailings</b> |                                                            | <b>1</b>    | <b>kg</b>         |
| <b>Inputs</b>                    |                                                            |             |                   |
| Occupation, dump site            | Elementary flows/Resource/land                             | 0.0011      | m <sup>2</sup> *a |
| Transformation, from unspecified | Elementary flows/Resource/land                             | 8.4416E-06  | m <sup>2</sup>    |
| Transformation, to dump site     | Elementary flows/Resource/land                             | 8.4416E-06  | m <sup>2</sup>    |
| <b>Outputs</b>                   |                                                            |             |                   |
| Aluminium III                    | Elementary flows/Emission to water/ground water, long-term | 0.01348     | kg                |
| Aluminium III                    | Elementary flows/Emission to water/ground water            | 0.000040744 | kg                |
| Antimony ion                     | Elementary flows/Emission to water/ground water            | 1.2102E-10  | kg                |
| Antimony ion                     | Elementary flows/Emission to water/ground water, long-term | 2.0319E-08  | kg                |
| Arsenic ion                      | Elementary flows/Emission to water/ground water            | 3.1909E-09  | kg                |
| Arsenic ion                      | Elementary flows/Emission to water/ground water, long-term | 5.7275E-07  | kg                |

|               |                                                            |             |    |
|---------------|------------------------------------------------------------|-------------|----|
| Barium II     | Elementary flows/Emission to water/ground water, long-term | 0.000020344 | kg |
| Barium II     | Elementary flows/Emission to water/ground water            | 5.4844E-10  | kg |
| Beryllium II  | Elementary flows/Emission to water/ground water, long-term | 1.927E-07   | kg |
| Beryllium II  | Elementary flows/Emission to water/ground water            | 2.2975E-09  | kg |
| Boron         | Elementary flows/Emission to water/ground water, long-term | 8.9636E-07  | kg |
| Boron         | Elementary flows/Emission to water/ground water            | 5.2078E-09  | kg |
| Cadmium II    | Elementary flows/Emission to water/ground water            | 1.6422E-09  | kg |
| Cadmium II    | Elementary flows/Emission to water/ground water, long-term | 1.0236E-07  | kg |
| Calcium II    | Elementary flows/Emission to water/ground water, long-term | 0.04624     | kg |
| Calcium II    | Elementary flows/Emission to water/ground water            | 0.00394     | kg |
| Chromium VI   | Elementary flows/Emission to water/ground water            | 2.4999E-06  | kg |
| Chromium VI   | Elementary flows/Emission to water/ground water, long-term | 0.00047     | kg |
| Cobalt II     | Elementary flows/Emission to water/ground water, long-term | 0.00085     | kg |
| Cobalt II     | Elementary flows/Emission to water/ground water            | 0.000037943 | kg |
| Copper ion    | Elementary flows/Emission to water/ground water            | 1.4634E-07  | kg |
| Copper ion    | Elementary flows/Emission to water/ground water, long-term | 0.000066804 | kg |
| Iron ion      | Elementary flows/Emission to water/ground water, long-term | 0.30743     | kg |
| Iron ion      | Elementary flows/Emission to water/ground water            | 0.00067     | kg |
| Lead II       | Elementary flows/Emission to water/ground water, long-term | 9.0954E-07  | kg |
| Lead II       | Elementary flows/Emission to water/ground water            | 4.5626E-10  | kg |
| Magnesium     | Elementary flows/Emission to water/ground water            | 0.00078     | kg |
| Magnesium     | Elementary flows/Emission to water/ground water, long-term | 0.00903     | kg |
| Manganese II  | Elementary flows/Emission to water/ground water            | 0.00024     | kg |
| Manganese II  | Elementary flows/Emission to water/ground water, long-term | 0.00737     | kg |
| Mercury II    | Elementary flows/Emission to water/ground water, long-term | 4.7249E-08  | kg |
| Mercury II    | Elementary flows/Emission to water/ground water            | 2.0108E-10  | kg |
| Molybdenum VI | Elementary flows/Emission to water/ground water            | 1.5676E-08  | kg |
| Molybdenum VI | Elementary flows/Emission to water/ground water, long-term | 3.0931E-07  | kg |
| Nickel II     | Elementary flows/Emission to water/ground water, long-term | 0.00451     | kg |
| Nickel II     | Elementary flows/Emission to water/ground water            | 0.000064237 | kg |
| Potassium I   | Elementary flows/Emission to water/ground water            | 4.2118E-08  | kg |
| Potassium I   | Elementary flows/Emission to water/ground water, long-term | 0.000016448 | kg |
| Scandium      | Elementary flows/Emission to water/ground water, long-term | 0.000063972 | kg |
| Scandium      | Elementary flows/Emission to water/ground water            | 8.9817E-07  | kg |
| Selenium IV   | Elementary flows/Emission to water/ground water            | 1.8771E-09  | kg |
| Selenium IV   | Elementary flows/Emission to water/ground water, long-term | 2.682E-07   | kg |
| Silicon       | Elementary flows/Emission to water/ground water            | 0.000051797 | kg |
| Silicon       | Elementary flows/Emission to water/ground water, long-term | 0.01044     | kg |
| Silver I      | Elementary flows/Emission to water/ground water            | 6.0994E-10  | kg |
| Silver I      | Elementary flows/Emission to water/ground water, long-term | 1.1434E-06  | kg |
| Sodium I      | Elementary flows/Emission to water/ground water            | 0.000079988 | kg |
| Sodium I      | Elementary flows/Emission to water/ground water, long-term | 0.00179     | kg |
| Strontium     | Elementary flows/Emission to water/ground water            | 1.4157E-07  | kg |
| Strontium     | Elementary flows/Emission to water/ground water, long-term | 0.000022153 | kg |
| Thallium I    | Elementary flows/Emission to water/ground water, long-term | 1.2989E-07  | kg |
| Thallium I    | Elementary flows/Emission to water/ground water            | 1.0951E-10  | kg |

|              |                                                            |             |    |
|--------------|------------------------------------------------------------|-------------|----|
| Tin ion      | Elementary flows/Emission to water/ground water, long-term | 8.4101E-07  | kg |
| Tin ion      | Elementary flows/Emission to water/ground water            | 3.9866E-09  | kg |
| Titanium ion | Elementary flows/Emission to water/ground water            | 3.2148E-08  | kg |
| Titanium ion | Elementary flows/Emission to water/ground water, long-term | 0.00019     | kg |
| Tungsten     | Elementary flows/Emission to water/ground water            | 3.6785E-09  | kg |
| Tungsten     | Elementary flows/Emission to water/ground water            | 3.2915E-07  | kg |
| Vanadium V   | Elementary flows/Emission to water/ground water, long-term | 1.6669E-06  | kg |
| Vanadium V   | Elementary flows/Emission to water/ground water            | 8.358E-09   | kg |
| Zinc II      | Elementary flows/Emission to water/ground water            | 1.7277E-06  | kg |
| Zinc II      | Elementary flows/Emission to water/ground water            | 0.000085372 | kg |

Table 7: Contribution analysis of climate impacts for HPAL processing route –sulfur burning flowsheet

| supply chain step      | contributor                                     | kgCO <sub>2eq</sub> /<br>kg Ni <sub>eq</sub> | %      |
|------------------------|-------------------------------------------------|----------------------------------------------|--------|
| Mining                 | Mobile equipment energy                         | 1.28                                         | 5.9%   |
| Mining                 | Explosives                                      | 0.32                                         | 1.5%   |
| Mining                 | Electricity for open-pit mining                 | 0.11                                         | 0.5%   |
| Beneficiation          | Electricity for grinding                        | 1.81                                         | 8.4%   |
| Concentrate processing | Limestone - embodied                            | 0.09                                         | 0.4%   |
| Concentrate processing | Magnesia - embodied                             | 5.19                                         | 24.0%  |
| Concentrate processing | Lime - embodied                                 | 0.28                                         | 1.3%   |
| Concentrate processing | Direct CO <sub>2</sub> emissions from limestone | 6.60                                         | 30.5%  |
| Concentrate processing | Electricity and acid production                 | 1.73                                         | 8.0%   |
| Sulfate conversion     | Sulphuric acid                                  | 0.51                                         | 2.4%   |
| Sulfate conversion     | Electricity (Coal)                              | 3.09                                         | 14.3%  |
| Sulfate conversion     | Sodium Hydroxide                                | 0.47                                         | 2.2%   |
| Sulfate conversion     | Process emissions                               | 0.06                                         | 0.3%   |
| Sulfate conversion     | Thermal Energy (Natural gas)                    | 0.11                                         | 0.5%   |
|                        | Total                                           | 21.64                                        | 100.0% |

To convert the HPAL inventory to an off-site coal-powered electricity mix, the heat of reactions of on-site sulfuric acid production were first summed as potential heat to recover <sup>9</sup>.

|                                                 |                                             |
|-------------------------------------------------|---------------------------------------------|
| $S + O_2 \rightarrow SO_2$                      | $\Delta H^0 = -296.9 \frac{kJ}{mol}$        |
| $SO_2 + \frac{1}{2}O_2 \rightarrow SO_3$        | $\Delta H^0 = -99.0 \frac{kJ}{mol}$         |
| $SO_3 + H_2O \rightarrow H_2SO_4$               | $\Delta H^0 = -132.5 \frac{kJ}{mol}$        |
| $S + \frac{3}{2}O_2 + H_2O \rightarrow H_2SO_4$ | $\Sigma \Delta H^0 = -528.4 \frac{kJ}{mol}$ |

Converting on a mass basis, (32g/mol of sulfur), we find that 16.51 MJ are produced per kg of sulfur converted into sulfuric acid. To convert on a basis of sulfuric acid, we can use a stoichiometric ratio of 0.33 kg of sulfur/kg sulfuric acid (32 g/mol S / 98 g/mol H<sub>2</sub>SO<sub>4</sub>), for 5,392 MJ/tonne of sulfuric acid. To obtain the final heat recovered, energy requirements to operate the sulfuric acid plant (834.5 MJ/tonne sulfuric acid) were subtracted <sup>10</sup> and a 40% heat recovery factor was assumed<sup>9</sup>. Therefore, we assume that 1,322 MJ are recovered per tonne of sulfuric acid produced.

In Table 5, it is reported that 11 kg of sulfur are required per tonne of nickel equivalent. The equivalent stoichiometric amount of sulfuric acid produced is 33.69 kg (11/0.33). Therefore, we will assume that the 44.54 MJ (34 kg\*1.3MJ/kg  $H_2SO_4$ ) recovered from the acid plant are supplied by off-site coal-powered electricity. The carbon emission factor for electricity production from hard coal inecoinvent v.3.9.1 is nearly identical to the carbon emission factor for the production mix in Indonesia.

Table 8 summarizes the changes to the HPAL inventory in the concentrate processing step, the only step that changes in the whole value chain.

Table 8 : Changes to the concentrate processing inventory for the HPAL-coal variant

| Concentrate processing                |                  |                |                                                                                                      |
|---------------------------------------|------------------|----------------|------------------------------------------------------------------------------------------------------|
| +electricity, high voltage            | 44.54            | MJ             | electricity production, hard coal   RoW (proxy for lignite, equivalent to Indonesian production mix) |
| lime, packed                          | 4.00             | kg             | market for lime, packed   RoW                                                                        |
| limestone, crushed, washed            | 15.00            | kg             | market for limestone, crushed, washed   RoW                                                          |
| magnesium oxide                       | 2.50             | kg             | market for magnesium oxide   GLO                                                                     |
| <del>sulfur</del>                     | <del>11.00</del> | <del>kg</del>  | <del>sulfur production, petroleum refinery operation   Row</del>                                     |
| +sulfuric acid                        | 33.69            | kg             | market for sulfuric acid   RoW                                                                       |
| Water, unspecified natural origin, ID | 0.16             | m <sup>3</sup> |                                                                                                      |
| Nickel equivalent                     | 1                | kg             |                                                                                                      |

Table 9: Contribution analysis of climate impacts for HPAL processing route – coal-powered flowsheet

| supply chain step      | contributor                                     | kgCO <sub>2eq</sub> /<br>kg Ni <sub>eq</sub> | %      |
|------------------------|-------------------------------------------------|----------------------------------------------|--------|
| Mining                 | Mobile equipment energy                         | 1.28                                         | 3.2%   |
| Mining                 | Explosives                                      | 0.32                                         | 0.8%   |
| Mining                 | Electricity for open-pit mining                 | 0.11                                         | 0.3%   |
| Beneficiation          | Electricity for grinding                        | 1.81                                         | 4.6%   |
| Concentrate processing | Limestone - embodied                            | 0.09                                         | 0.2%   |
| Concentrate processing | Magnesia - embodied                             | 5.19                                         | 13.1%  |
| Concentrate processing | Lime - embodied                                 | 0.28                                         | 0.7%   |
| Concentrate processing | Direct CO <sub>2</sub> emissions from limestone | 6.60                                         | 16.7%  |
| Concentrate processing | Electricity and acid production                 | 19.56                                        | 49.6%  |
| Sulfate conversion     | Sulphuric acid                                  | 0.51                                         | 1.3%   |
| Sulfate conversion     | Electricity (Coal)                              | 3.09                                         | 7.8%   |
| Sulfate conversion     | Sodium Hydroxide                                | 0.47                                         | 1.2%   |
| Sulfate conversion     | Process emissions                               | 0.06                                         | 0.1%   |
| Sulfate conversion     | Thermal Energy (Natural gas)                    | 0.11                                         | 0.3%   |
|                        | Total                                           | 39.48                                        | 100.0% |

### S1.3 Inventory modelling for bioheap leaching processing of sulfide ores

Data sourced for the construction of the mining and beneficiation inventory for bioheap leaching is listed in Table 10. The reference year selected for the inventory was 2020 due to its higher data completeness. For inventory modelling, data was primarily sourced from two environmental permits, one for mining and concentrate processing operations until nickel sulfide intermediate <sup>11</sup> and another for refining until battery-grade nickel sulfate <sup>12</sup>. For comminution requirements during beneficiation, the Bond equation (refer to Equation S1) was used as an approximation, with necessary parameters also listed in Table 10.



Table 10: Parameters utilized for the modelling of the mining and beneficiation inventory for bioheap leaching

| Parameters                                                                         | Reference inventory | Precisions                                                                                                                                                                            |
|------------------------------------------------------------------------------------|---------------------|---------------------------------------------------------------------------------------------------------------------------------------------------------------------------------------|
| Strip ratio ( <i>S</i> )                                                           | 0.98 <sup>11</sup>  |                                                                                                                                                                                       |
| $x_{Ni,ore}$                                                                       | 0.27% <sup>11</sup> |                                                                                                                                                                                       |
| P80 ( $\mu\text{m}$ )                                                              | 8000 <sup>13</sup>  |                                                                                                                                                                                       |
| F80 ( $\mu\text{m}$ )                                                              | 8000 000            | Unknown, but assumed that a 1000 X reduction is performed as conservative estimate. Since P80 is high the energy consumption for grinding remains low according to the Bond equation. |
| $\eta_{bioleaching}$                                                               | 99.0% <sup>13</sup> |                                                                                                                                                                                       |
| $\eta_{processing\ to\ NiS}$                                                       | 90.0% <sup>11</sup> |                                                                                                                                                                                       |
| $\eta_{refining}$                                                                  | 99.8% <sup>12</sup> |                                                                                                                                                                                       |
| $m_{ore}/m_{Ni,final}$ non allocated                                               | 588.0 <sup>14</sup> |                                                                                                                                                                                       |
| Mass allocation factor for nickel for mining to concentrate processing inventories | 30%                 | Calculated based on the mass of final products from processing operations to nickel-cobalt sulfide <sup>11</sup>                                                                      |
| $m_{ore}/m_{Ni,final}$ allocated to Ni                                             | 176.2               | $m_{ore}/m_{Ni,final} * allocation\ factor$                                                                                                                                           |
| $\eta_{beneficiation}$                                                             | 70.8%               | Calculated by rearranging Equation 4 (main manuscript)                                                                                                                                |

Table 11: Inventory for bioheap leaching processing route

| Inputs                                          |               |                   |                                                                         |
|-------------------------------------------------|---------------|-------------------|-------------------------------------------------------------------------|
| Flow                                            | Amount        | Unit              | Provider/Description                                                    |
| <b>Mining and beneficiation</b>                 |               |                   |                                                                         |
| blasting                                        | 0.11          | kg                | market for blasting   blasting   GLO                                    |
| diesel, burned in building machine              | 11.28         | MJ                | diesel, burned in building machine   GLO                                |
| electricity, high voltage                       | 0.29          | kWh               | electricity, high voltage, production mix   FI                          |
| <b>Sulfide ore</b>                              | <b>176.17</b> | <b>kg</b>         |                                                                         |
| Occupation, industrial area, FI                 | 0.009         | m <sup>2</sup> *a |                                                                         |
| Transformation, to industrial area, FI          | 0.009         | m <sup>2</sup>    |                                                                         |
| Cobalt                                          | 0.04          | kg                | Resource/in ground                                                      |
| Copper                                          | 0.25          | kg                | Resource/in ground                                                      |
| Iron                                            | 18.15         | kg                | Resource/in ground                                                      |
| Nickel                                          | 0.48          | kg                | Resource/in ground                                                      |
| Zinc                                            | 0.99          | kg                | Resource/in ground                                                      |
| <b>Concentrate processing to nickel sulfide</b> |               |                   |                                                                         |
| sulfuric acid                                   | 1.14          | kg                | market for sulfuric acid   RER                                          |
| sulfur dioxide                                  | 0.005         | kg                | market for sulfur dioxide, liquid   RER                                 |
| sodium hydroxide                                | 0.45          | kg                | market for sodium hydroxide, without water, in 50% solution state   GLO |
| limestone, crushed, washed                      | 0.96          | kg                | market for limestone, crushed, washed   RoW                             |
| lime, packed                                    | 0.90          | kg                | market for lime, packed   RoW                                           |
| foaming agent                                   | 0.0039        | kg                | market for foaming agent   GLO                                          |

|                                                                                  |          |     |                                                                                                       |
|----------------------------------------------------------------------------------|----------|-----|-------------------------------------------------------------------------------------------------------|
| hydrogen peroxide                                                                | 0.026    | kg  | market for hydrogen peroxide, without water, in 50% solution state   RER                              |
| hydrogen sulfide                                                                 | 0.63     | kg  | market for hydrogen sulfide   RER                                                                     |
| hydrochloric acid                                                                | 0.00016  | kg  | market for hydrochloric acid, without water, in 30% solution state   RoW                              |
| electricity, high voltage                                                        | 2.90     | kWh | electricity, high voltage, production mix   FI                                                        |
| heat, district or industrial, other than natural gas (steam from light fuel oil) | 0.32     | kWh | heat production, light fuel oil, at industrial furnace 1MW   RoW                                      |
| <b>Nickel sulfate refining</b>                                                   |          |     |                                                                                                       |
| electricity, high voltage                                                        | 1.86     | kWh | electricity, high voltage, production mix   FI                                                        |
| heat, district or industrial, other than natural gas (heat from biomass)         | 2.34     | kWh | heat production, wood chips from industry, at furnace 1000kW   RoW                                    |
| ammonia                                                                          | 0.73     | kg  | market for ammonia, anhydrous, liquid   RER                                                           |
| oxygen                                                                           | 1.56     | kg  | air separation, cryogenic   oxygen, liquid   FI                                                       |
| Sulfur dioxide                                                                   | 0.0004   | kg  | market for sulfur dioxide, liquid   RER                                                               |
| sodium hydroxide, without water, in 50% solution state                           | 0.13     | kg  | market for sodium hydroxide, without water, in 50% solution state   GLO                               |
| soda ash, dense                                                                  | 0.05     | kg  | market for soda ash, dense   GLO                                                                      |
| chemical, organic (proxy for precipitation agent)                                | 0.04     | kg  | market for chemical, organic   GLO                                                                    |
| chemical, organic (proxy for organic extraction solvent)                         | 0.0018   | kg  | market for chemical, organic   GLO                                                                    |
| chemical, organic (proxy for Cyanex 272)                                         | 0.00013  | kg  | market for chemical, organic   GLO                                                                    |
| chemical, organic (proxy for D-2EHPA)                                            | 0.00013  | kg  | market for chemical, organic   GLO                                                                    |
| chemical, organic (proxy for V10)                                                | 0.00013  | kg  | market for chemical, organic   GLO                                                                    |
| sulfuric acid                                                                    | 2.60     | kg  | market for sulfuric acid   RER                                                                        |
| water, deionized                                                                 | 5.20     | kg  | market for water, deionised   Europe without Switzerland                                              |
| <b>Outputs</b>                                                                   |          |     |                                                                                                       |
| carbon dioxide                                                                   | 0.42     | kg  | Direct CO <sub>2</sub> emissions from limestone usage<br>Elementary flows/Emission to air/unspecified |
| <b>Nickel equivalent</b>                                                         | 1        | kg  |                                                                                                       |
| Ammonium sulfate                                                                 | 6.50E-05 | kg  | Elementary flows/Emission to air/unspecified                                                          |
| Copper ion                                                                       | 9.47E-08 | kg  | Elementary flows/Emission to water/surface water                                                      |
| Manganese II                                                                     | 6.62E-05 | kg  | Elementary flows/Emission to water/surface water                                                      |
| Nickel II                                                                        | 1.88E-06 | kg  | Elementary flows/Emission to water/surface water                                                      |
| Nickel refinery dust                                                             | 0.00016  | kg  | Elementary flows/Emission to air/unspecified                                                          |
| NM VOC, non-methane volatile organic compounds                                   | 0.00359  | kg  | Elementary flows/Emission to air/unspecified                                                          |
| Sodium I                                                                         | 9.04E-06 | kg  | Elementary flows/Emission to water/surface water                                                      |
| Sulfate                                                                          | 0.00011  | kg  | Elementary flows/Emission to water/surface water                                                      |
| Zinc II                                                                          | 4.04E-06 | kg  | Elementary flows/Emission to water/surface water                                                      |

Table 12: Contribution analysis for bioheap leaching of sulfide ores

| supply chain step         | contributor                             | kgCO <sub>2eq</sub> / kg Ni <sub>eq</sub> | %      |
|---------------------------|-----------------------------------------|-------------------------------------------|--------|
| Mining                    | Mobile equipment energy                 | 1.12                                      | 14.6%  |
| Mining                    | Explosives                              | 0.49                                      | 6.4%   |
| Beneficiation             | Electricity for grinding                | 6.29E-02                                  | 0.8%   |
| Concentrate processing    | Chemicals for mixed sulphide refining   | 1.19                                      | 15.5%  |
| Concentrate processing    | Electricity for mixed sulphide refining | 0.64                                      | 8.3%   |
| Concentrate processing    | Steam for mixed sulphide refining       | 0.09                                      | 1.1%   |
| Concentrate processing    | Hydromet process emissions              | 0.42                                      | 5.5%   |
| Nickel sulfate conversion | Electricity for sulfate refining        | 0.41                                      | 5.4%   |
| Nickel sulfate conversion | Chemicals for sulfate refining          | 3.20                                      | 41.7%  |
| Nickel sulfate conversion | Steam for sulphate refining             | 0.05                                      | 0.7%   |
|                           | Total                                   | 7.66                                      | 100.0% |

#### S1.4 Inventory modelling for the bioleaching of sulfidic tailings

To adjust the inventory on a 1 kg Ni<sub>eq</sub> basis, mass allocation was performed on two different datasets, one for concentrate processing<sup>15</sup> and one for nickel sulfate refining<sup>12</sup>. For the latter, refer to section S1.4. It is to be noted that using the inventory from bioheap leaching for nickel sulfide refining is the main limitation of the tailings bioleaching inventory. Indeed, the consumption of chemicals will vary based on the proportion of impurities found in the nickel sulfide compound. As a comparative standpoint, the nickel sulfide intermediate from bioheap leaching contains between 43-60% Ni<sup>11</sup>, while NiS from tailings bioleaching contains 65% Ni<sup>15</sup>. Therefore, using the inventory from a less pure intermediate as proxy may be a conservative estimate, assuming similar impurities in both intermediates.

For concentrate processing, an allocation factor of 19% was attributed to nickel, based on the following valuable products breakdown<sup>15</sup>.

Table 13: Mass allocation for bioleaching of tailings

| Valuable products        | Mass (tonnes) | Allocation factor |
|--------------------------|---------------|-------------------|
| Copper equivalent in CuS | 335           | 11%               |
| Zinc equivalent in ZnS   | 1,126         | 36%               |
| Nickel equivalent in NiS | 603           | <b>19%</b>        |
| Cobalt equivalent in CoS | 1,028         | 33%               |
| Sum                      | 3,091         | 100%              |

Table 14: Inventory for tailings bioleaching processing route

| Inputs                        |              |           |                                               |
|-------------------------------|--------------|-----------|-----------------------------------------------|
| Flow                          | Amount       | Unit      | Provider/Description                          |
| <b>Concentrate processing</b> |              |           |                                               |
| <b>Tailings (dry mass)</b>    | <b>10.59</b> | <b>kg</b> |                                               |
| sulfuric acid                 | 0.32         | kg        | market for sulfuric acid   RER                |
| limestone, crushed, for mill  | 0.53         | kg        | market for limestone, crushed, for mill   RoW |
| magnesium oxide               | 0.18         | kg        | market for magnesium oxide   RER              |

|                                                                          |         |                |                                                                                                                           |
|--------------------------------------------------------------------------|---------|----------------|---------------------------------------------------------------------------------------------------------------------------|
| calcium carbonate, precipitated                                          | 7.46    | kg             | market for calcium carbonate production, precipitated   RER                                                               |
| ammonium sulfate                                                         | 0.18    | kg             | market for ammonium sulfate   RER                                                                                         |
| hydrogen sulfide                                                         | 0.32    | kg             | market for hydrogen sulfide   RER                                                                                         |
| cement, Portland                                                         | 0.28    | kg             | market for cement, Portland   Europe without Switzerland                                                                  |
| electricity, high voltage                                                | 0.0087  | MJ             | electricity, high voltage, production mix   SE                                                                            |
| water, unspecified natural origin, SE                                    | 0.19    | m <sup>3</sup> |                                                                                                                           |
| process-specific burdens, inert material landfill                        | 19.77   | kg             | process-specific burdens, inert material landfill   CH                                                                    |
| <b>Nickel sulfate refining</b>                                           |         |                |                                                                                                                           |
| electricity, high voltage                                                | 1.86    | kWh            | electricity, high voltage, production mix   SE                                                                            |
| heat, district or industrial, other than natural gas (heat from biomass) | 2.34    | kWh            | heat production, wood chips from industry, at furnace 1000kW   heat, district or industrial, other than natural gas   RoW |
| ammonia                                                                  | 0.73    | kg             | market for ammonia, anhydrous, liquid   ammonia, anhydrous, liquid   RER                                                  |
| oxygen                                                                   | 1.56    | kg             | air separation, cryogenic   oxygen, liquid   SE                                                                           |
| Sulfur dioxide                                                           | 0.0004  | kg             | market for sulfur dioxide, liquid   RER                                                                                   |
| sodium hydroxide, without water, in 50% solution state                   | 0.13    | kg             | market for sodium hydroxide, without water, in 50% solution state   GLO                                                   |
| soda ash, dense                                                          | 0.05    | kg             | market for soda ash, dense   GLO                                                                                          |
| chemical, organic (proxy for precipitation agent)                        | 0.04    | kg             | market for chemical, organic   GLO                                                                                        |
| chemical, organic (proxy for organic extraction solvent)                 | 0.0018  | kg             | market for chemical, organic   GLO                                                                                        |
| chemical, organic (proxy for Cyanex 272)                                 | 0.00013 | kg             | market for chemical, organic   GLO                                                                                        |
| chemical, organic (proxy for D-2EHPA)                                    | 0.00013 | kg             | market for chemical, organic   GLO                                                                                        |
| chemical, organic (proxy for V10)                                        | 0.00013 | kg             | market for chemical, organic   GLO                                                                                        |
| sulfuric acid                                                            | 2.60    | kg             | market for sulfuric acid   RER                                                                                            |
| water, deionized                                                         | 5.20    | kg             | market for water, deionised   Europe, without Switzerland                                                                 |
| <b>Outputs</b>                                                           |         |                |                                                                                                                           |
| carbon dioxide                                                           | 3.28    | kg             | Direct CO <sub>2</sub> emissions from limestone usage                                                                     |
| <b>Nickel equivalent</b>                                                 | 1       | kg             |                                                                                                                           |
| sand                                                                     | 3.30    | kg             |                                                                                                                           |
| gravel, round                                                            | 3.30    | kg             |                                                                                                                           |

It is to be noted that since very low, electricity requirements to grind tailings to 20 µm before the bioleaching reactor is accounted for in the concentrate processing electricity contributor<sup>15</sup>, and not in the beneficiation stage.

Table 15: Contribution analysis for bioleaching of sulfidic tailings

| supply chain step         | contributor                      | kgCO <sub>2eq</sub> / kg Ni <sub>eq</sub> | %       |
|---------------------------|----------------------------------|-------------------------------------------|---------|
| Concentrate processing    | Chemicals                        | 3.73                                      | 36.57%  |
| Concentrate processing    | Electricity                      | 5.54E-05                                  | 0.00%   |
| Concentrate processing    | Process emissions                | 3.28                                      | 32.21%  |
| Concentrate processing    | Tailings back-filling            | 0.31                                      | 3.01%   |
| Nickel sulfate conversion | Electricity for sulfate refining | 0.04                                      | 0.42%   |
| Nickel sulfate conversion | Chemicals for sulfate refining   | 2.78                                      | 27.30%  |
| Nickel sulfate conversion | Heat for sulfate refining        | 0.05                                      | 0.50%   |
|                           | Total                            | 10.19                                     | 100.00% |

### S1.5 Inventory modelling for the pyrometallurgical treatment of sulfide ores

Only energetic requirements are provided in the corresponding mining and beneficiation inventory for flash smelting of sulfide ores <sup>16</sup>. For completeness, we scaled the material portion of the inventory for mining and beneficiation of sulfide concentrate (16%) in the ecoinvent database <sup>2</sup>. Conversion to nickel sulfate is also based on the corresponding dataset in ecoinvent <sup>2</sup>.

Table 16: Parameters utilized for the scaling of the material mining and beneficiation inventory for flash smelting

| Parameters                 | Reference inventory | Scaled inventory    | Precisions                                                                                                |
|----------------------------|---------------------|---------------------|-----------------------------------------------------------------------------------------------------------|
| Strip ratio ( <i>S</i> )   | 2.67 <sup>2</sup>   |                     | Obtained from the process model for nickel mine operation and beneficiation to nickel concentrate, 16% Ni |
| $x_{Ni,ore}$               | 2.80% <sup>3</sup>  | 2.05% <sup>16</sup> |                                                                                                           |
| $m_{Ni,concentrate}$       | 16.0% <sup>2</sup>  | 11.5% <sup>16</sup> |                                                                                                           |
| $m_{rock}/m_{concentrate}$ | 26.5 <sup>2</sup>   | 26.0                | For the scaled inventory: calculated from Equation 3 (main manuscript)                                    |

Table 17: Inventory for flash smelting of sulfide ores and ammoniacal hydrogen precipitation to nickel metal

| Inputs                                          |        |      |                                                                                                     |
|-------------------------------------------------|--------|------|-----------------------------------------------------------------------------------------------------|
| Flow                                            | Amount | Unit | Provider/Description                                                                                |
| Mining and beneficiation                        |        |      |                                                                                                     |
| Nickel concentrate                              | 7.79   | kg   | scaled material inventory for nickel mine operation and beneficiation to nickel concentrate, 16% Ni |
| diesel, burned in building machine              | 3.64   | MJ   | market for diesel, burned in building machine   GLO                                                 |
| electricity, medium voltage (mine operation)    | 2.28   | kWh  | market for electricity, medium voltage   CA-ON                                                      |
| electricity, medium voltage (mine operation)    | 3.06   | kWh  | market for electricity, medium voltage   CA-ON                                                      |
| Concentrate processing                          |        |      |                                                                                                     |
| transport, freight, lorry >32 metric ton, EURO4 | 3.54   | t*km | transport, freight, lorry >32 metric ton, EURO4   RoW                                               |
| Flash smelting                                  |        |      |                                                                                                     |
| heat, district or industrial, natural gas       | 8.20   | MJ   | heat production, natural gas, at industrial furnace >100kW   CA-QC                                  |

|                                                      |       |      |                                                                    |
|------------------------------------------------------|-------|------|--------------------------------------------------------------------|
| heat, district or industrial, other than natural gas | 6.24  | MJ   | heat production, light fuel oil, at industrial furnace 1MW   CA-QC |
| heat, district or industrial, other than natural gas | 11.22 | MJ   | heat production, at hard coal industrial furnace 1-10MW   CA-QC    |
| oxygen, liquid                                       | 0.49  | kg   | air separation, cryogenic   ON                                     |
| silica sand                                          | 2.24  | kg   | market for silica sand   GLO                                       |
| <b>Settling furnace</b>                              |       |      |                                                                    |
| heat, district or industrial, other than natural gas | 9.01  | MJ   | heat production, at coal coke industrial furnace 1-10MW   CA-QC    |
| electricity, high voltage                            | 0.70  | kWh  | electricity, high voltage, production mix   CA-ON                  |
| <b>Converter</b>                                     |       |      |                                                                    |
| silica sand                                          | 0.29  | kg   | market for silica sand   GLO                                       |
| <b>Hydrogen reduction to nickel metal</b>            |       |      |                                                                    |
| transport, freight, lorry >32 metric ton, EURO4      | 0.91  | t*km | transport, freight, lorry >32 metric ton, EURO4   RoW              |
| ammonia, anhydrous, liquid                           | 0.64  | kg   | market for ammonia, anhydrous, liquid   RoW                        |
| hydrogen, liquid                                     | 0.07  | kg   | market for hydrogen, liquid   RoW                                  |
| electricity, high voltage                            | 2.90  | kWh  | electricity, high voltage, production mix   CA-ON                  |
| heat, district or industrial, natural gas            | 18.50 | MJ   | heat production, natural gas, at industrial furnace >100kW   CA-QC |
| <b>Outputs</b>                                       |       |      |                                                                    |
| <b>Nickel metal</b>                                  | 1     | kg   |                                                                    |

The following contribution analysis for the flash smelting route was obtained for refining up to nickel sulfate.

*Table 18: Contribution analysis for the flash smelting of sulfide ores up to nickel sulfate*

| supply chain step         | contributor                       | kgCO <sub>2eq</sub> / kg Ni <sub>eq</sub> | %     |
|---------------------------|-----------------------------------|-------------------------------------------|-------|
| mining                    | Mobile equipment energy           | 0.36                                      | 3.0%  |
| mining                    | Explosives                        | 0.19                                      | 1.6%  |
| mining                    | Cement                            | 1.29                                      | 10.9% |
| mining                    | Electric energy                   | 0.16                                      | 1.4%  |
| mining                    | Other (EG, lubricating oil, sand) | 0.29                                      | 2.5%  |
| beneficiation             | Flotation chemicals               | 0.38                                      | 3.2%  |
| beneficiation             | Electricity for grinding          | 0.22                                      | 1.8%  |
| concentrate processing    | Concentrate drying                | 0.46                                      | 3.9%  |
| concentrate processing    | Chemical reagents                 | 2.69                                      | 22.7% |
| concentrate processing    | Silica sand                       | 0.11                                      | 0.9%  |
| concentrate processing    | Electricity                       | 0.26                                      | 2.2%  |
| concentrate processing    | Reductants                        | 2.86                                      | 24.1% |
| concentrate processing    | Thermal energy                    | 1.50                                      | 12.7% |
| concentrate processing    | Transportation                    | 0.37                                      | 3.1%  |
| nickel sulfate conversion | Sulfate - Sulfuric acid           | 0.30                                      | 2.5%  |

|                           |                  |       |        |
|---------------------------|------------------|-------|--------|
| nickel sulfate conversion | Sulfate - Energy | 0.41  | 3.4%   |
|                           | Sum              | 11.86 | 100.0% |

The following contribution analysis was generated by considering the full product system available in the ecoinvent v.3.9.1 dataset for smelting and refining of 16% nickel concentrate, adding the step for nickel sulfate conversion which process model is also provided in the database<sup>2</sup>. The contribution analysis is scaled from a kg nickel sulfate basis to a kg Ni<sub>eq</sub> using a nickel content of 39% in anhydrous nickel sulfate.

Table 19: Contribution analysis of the smelting and refining of sulfide concentrate to nickel sulfate inventory in ecoinvent

| supply chain step         | contributor                        | kgCO <sub>2eq</sub> / kg Ni <sub>eq</sub> | %      |
|---------------------------|------------------------------------|-------------------------------------------|--------|
| mining                    | Mobile equipment energy            | 1.10                                      | 9.1%   |
| Mining                    | Electricity                        | 0.07                                      | 0.6%   |
| mining                    | Explosives                         | 0.14                                      | 1.2%   |
| mining                    | Cement                             | 0.96                                      | 8.0%   |
| mining                    | Other (EG, lubricating oil, sand)  | 0.33                                      | 2.8%   |
| beneficiation             | Flotation chemicals                | 0.28                                      | 2.4%   |
| concentrate processing    | Ammonia                            | 0.24                                      | 2.0%   |
| concentrate processing    | Hydrogen                           | 0.01                                      | 0.1%   |
| concentrate processing    | Lime                               | 0.14                                      | 1.1%   |
| concentrate processing    | Silica sand                        | 0.08                                      | 0.7%   |
| concentrate processing    | Electricity                        | 2.55                                      | 21.3%  |
| concentrate processing    | Heat from natural gas              | 0.72                                      | 6.0%   |
| concentrate processing    | Heat, other than natural gas       | 2.74                                      | 22.9%  |
| concentrate processing    | Transportation                     | 0.25                                      | 2.1%   |
| concentrate processing    | Process emissions                  | 0.87                                      | 7.3%   |
| nickel sulfate conversion | Sulfate - Sulfuric acid            | 0.30                                      | 2.5%   |
| nickel sulfate conversion | Sulfate - Thermal energy           | 0.33                                      | 2.8%   |
| nickel sulfate conversion | Sulfate - Electricity              | 0.74                                      | 6.2%   |
| nickel sulfate conversion | Other (chemical factory, nitrogen) | 0.13                                      | 1.1%   |
|                           | Total                              | 11.99                                     | 100.0% |

## S1.6 Inventory modelling for RKEF processing of laterite ores

Scaling of the disaggregated contribution data was performed using the parameters described in Table 20.

Table 20: Parameters utilized for the scaling of the mining and beneficiation inventory

| Parameters                       | Reference inventory                 | Scaled inventory   | Precisions                                   |
|----------------------------------|-------------------------------------|--------------------|----------------------------------------------|
| Strip ratio (S)                  | 1 <sup>7</sup>                      |                    |                                              |
| $x_{Ni,ore}$                     | 1.30% <sup>7</sup>                  | 1.22% <sup>8</sup> |                                              |
| $\eta_{beneficiation}$           | n/a (no beneficiation) <sup>7</sup> |                    |                                              |
| $\eta_{concentrate\ processing}$ | 93.0% <sup>17</sup>                 | 88.0% <sup>8</sup> |                                              |
| $\eta_{refining}$                | 99.5% <sup>2</sup>                  |                    |                                              |
| $m_{rock}/m_{Ni,final}$          | 166.3                               | 187.3              | Calculated from Equation 2 (main manuscript) |
| $m_{concentrate}/m_{Ni,final}$   | 83.2                                | 93.6               | Calculated from Equation 5 (main manuscript) |

Table 21: RKEF processing route life cycle inventory

| <b>Inputs</b>                                          |               |                   |                                                                         |
|--------------------------------------------------------|---------------|-------------------|-------------------------------------------------------------------------|
| <b>Flow</b>                                            | <b>Amount</b> | <b>Unit</b>       | <b>Provider/Description</b>                                             |
| <b>Mining</b>                                          |               |                   |                                                                         |
| blasting                                               | 0.03          | kg                | market for blasting   GLO                                               |
| diesel, burned in building machine                     | 13.59         | MJ                | diesel, burned in building machine   GLO                                |
| diesel, burned in diesel-electric generating set, 10MW | 3.56          | MJ                | diesel, burned in diesel-electric generating set, 10MW   GLO            |
| <b>Laterite ore</b>                                    | <b>93.64</b>  | <b>kg</b>         |                                                                         |
| Occupation, industrial area, ID                        | 0.07          | m <sup>2</sup> *a |                                                                         |
| Transformation, to industrial area, ID                 | 0.07          | m <sup>2</sup>    |                                                                         |
| Aluminium                                              | 2.78          | kg                |                                                                         |
| Calcium                                                | 0.04          | kg                | Resource / in ground                                                    |
| Chromium                                               | 2.15          | kg                | Resource / in ground                                                    |
| Cobalt                                                 | 0.19          | kg                | Resource / in ground                                                    |
| Iron                                                   | 42.15         | kg                | Resource / in ground                                                    |
| Magnesium                                              | 0.86          | kg                | Resource / in ground                                                    |
| Manganese                                              | 1.10          | kg                | Resource / in ground                                                    |
| Nickel                                                 | 1.15          | kg                | Resource / in ground                                                    |
| Potassium                                              | 0.01          | kg                | Resource / in ground                                                    |
| Sodium                                                 | 0.12          | kg                | Resource / in ground                                                    |
| <b>Concentrate processing</b>                          |               |                   |                                                                         |
| electricity, high voltage                              | 37.00         | kWh               | electricity, high voltage, production mix   ID                          |
| heat, district or industrial, natural gas              | 34.00         | kWh               | market for heat, district or industrial, natural gas   RoW              |
| heat, district or industrial, other than natural gas   | 317.90        | MJ                | heat production, at hard coal industrial furnace 1-10MW   RoW           |
| <b>Nickel sulfate refining</b>                         |               |                   |                                                                         |
| electricity, high voltage                              | 40.10         | kWh               | electricity, high voltage, production mix   ID                          |
| heat, district or industrial, natural gas              | 5.56          | MJ                | market group for heat, district or industrial, natural gas   RoW        |
| limestone, crushed, washed                             | 6.10          | kg                | market for limestone, crushed, washed   RoW                             |
| soda ash, dense                                        | 0.10          | kg                | market for soda ash, dense   GLO                                        |
| sodium hydroxide, without water, in 50% solution state | 0.10          | kg                | market for sodium hydroxide, without water, in 50% solution state   GLO |
| sulfuric acid                                          | 7.50          | kg                | market for sulfuric acid   RoW                                          |
| Water, unspecified natural origin, ID                  | 0.14          | m <sup>3</sup>    |                                                                         |
| <b>Outputs</b>                                         |               |                   |                                                                         |
| Carbon dioxide                                         | 2.68          | kg                | Direct CO <sub>2</sub> emissions from limestone usage                   |
| <b>Nickel equivalent</b>                               | <b>1</b>      | <b>kg</b>         |                                                                         |



Table 22: Contribution analysis of climate impacts for RKEF processing route

| supply chain step         | contributor                          | kgCO <sub>2eq</sub> /<br>kg Ni <sub>eq</sub> | %      |
|---------------------------|--------------------------------------|----------------------------------------------|--------|
| Mining                    | Mobile equipment energy              | 1.35                                         | 1.0%   |
| Mining                    | Explosives                           | 0.11                                         | 0.1%   |
| Mining                    | Electricity for open-pit mining      | 0.34                                         | 0.2%   |
| Concentrate processing    | Char and hard coal - Calcination     | 43.84                                        | 31.4%  |
| Concentrate processing    | Fuel - Drier                         | 4.67                                         | 3.3%   |
| Concentrate processing    | Electric arc furnace consumption     | 40.76                                        | 29.2%  |
| Nickel sulfate conversion | Limestone                            | 0.04                                         | 0.0%   |
| Nickel sulfate conversion | Limestone - direct emissions         | 2.68                                         | 1.9%   |
| Nickel sulfate conversion | Sodium carbonate                     | 0.13                                         | 0.1%   |
| Nickel sulfate conversion | Thermal energy                       | 0.21                                         | 0.2%   |
| Nickel sulfate conversion | Electricity - conversion to sulphate | 44.17                                        | 31.6%  |
| Nickel sulfate conversion | Sulfuric acid                        | 1.15                                         | 0.8%   |
| Nickel sulfate conversion | Sodium hydroxide                     | 0.13                                         | 0.1%   |
|                           | Total                                | 139.58                                       | 100.0% |

## S1.7 Underlying data of figures

Table 23: Underlying data of Figure 3

| supply chain step         | contributor                                    | Tailings bioleaching | Bioheap leaching | POX leaching | Flash smelting | HPAL  | RKEF-NPI |
|---------------------------|------------------------------------------------|----------------------|------------------|--------------|----------------|-------|----------|
| Mining                    | Mining operations                              | 0.00                 | 11.28            | 7.76         | 11.86          | 16.25 | 17.17    |
| Beneficiation             | Electricity for grinding                       | 0.00                 | 1.03             | 3.25         | 11.03          | 5.94  | 0.00     |
| Concentrate processing    | Process electricity including electric heating | 8.73E-03             | 10.46            | 41.15        | 12.94          | 44.56 | 133.20   |
| Concentrate processing    | Process heat from combustion                   | 0.00                 | 1.16             | 0.34         | 53.17          | 0.00  | 440.30   |
| Nickel sulfate conversion | Electricity for refining                       | 1.34                 | 6.71             | 3.77         | 3.77           | 10.15 | 144.36   |
| Nickel sulfate conversion | Heat for refining                              | 8.43                 | 8.43             | 5.92         | 5.92           | 2.05  | 5.56     |

Table 24: Underlying data of Figure 4

| contributor                       | POX leaching | Bioheap leaching | Tailings bioleaching | Flash smelting | Smelting ecoinvent | GLO ecoinvent |
|-----------------------------------|--------------|------------------|----------------------|----------------|--------------------|---------------|
| Mobile equipment energy           | 0.77         | 1.12             | 0.00                 | 0.36           | 1.10               | 0.00          |
| Explosives                        | 0.10         | 0.49             | 0.00                 | 0.19           | 0.14               | 0.21          |
| Cement                            | 0.67         | 0.00             | 0.00                 | 1.29           | 0.96               | 0.00          |
| Other (EG, lubricating oil, sand) | 0.15         | 0.00             | 0.00                 | 0.29           | 0.33               | 1.02          |
| Mine operation                    | 0.00         | 0.00             | 0.00                 | 0.16           | 0.00               | 3.55          |
| Electricity for concentrate       | 0.07         | 0.06             | 0.00                 | 0.22           | 0.07               | 1.87          |

|                                   |        |      |          |      |      |      |
|-----------------------------------|--------|------|----------|------|------|------|
| Chemicals for beneficiation       | 0.20   | 0.00 | 0.00     | 0.38 | 0.28 | 0.31 |
| Reductants                        | 0.00   | 0.00 | 0.00     | 2.86 | 2.74 | 0.60 |
| Chemicals                         | 1.20   | 1.19 | 3.73     | 2.80 | 0.47 | 0.00 |
| Electricity                       | 0.91   | 0.64 | 5.54E-05 | 0.26 | 2.55 | 2.53 |
| Thermal energy                    | 0.03   | 0.09 | 0.00     | 1.96 | 0.72 | 1.60 |
| Process emissions                 | 0.0015 | 0.42 | 3.28     | 0.00 | 0.87 | 5.84 |
| Transportation                    | 0.00   | 0.00 | 0.00     | 0.37 | 0.25 | 0.00 |
| Inert waste treatment             | 0.00   | 0.00 | 0.31     | 0.00 | 0.00 | 0.00 |
| Electricity for sulfate refining  | 0.09   | 0.41 | 0.04     | 0.07 | 0.74 | 0.74 |
| Chemicals for sulfate refining    | 0.30   | 3.20 | 2.78     | 0.30 | 0.30 | 0.26 |
| Heat for sulfate refining         | 0.33   | 0.05 | 0.05     | 0.33 | 0.33 | 0.23 |
| Sulfate refining direct emissions | 0.00   | 0.00 | 0.00     | 0.00 | 0.00 | 0.00 |
| Other (factory, nitrogen)         | 0.00   | 0.00 | 0.00     | 0.00 | 0.13 | 0.26 |

The same data now processed in percentage form is presented in Table 25.

*Table 25: Underlying data of Figure 4 in percentage form*

| contributor                       | POX leaching | Bioheap leaching | Tailings bioleaching | Flash smelting | Smelting ecoinvent | GLO ecoinvent |
|-----------------------------------|--------------|------------------|----------------------|----------------|--------------------|---------------|
| Mobile equipment energy           | 16.0%        | 14.6%            | 0.0%                 | 3.0%           | 9.1%               | 0.0%          |
| Explosives                        | 2.1%         | 6.4%             | 0.0%                 | 1.6%           | 1.2%               | 1.1%          |
| Cement                            | 13.9%        | 0.0%             | 0.0%                 | 10.9%          | 8.0%               | 0.0%          |
| Other (EG, lubricating oil, sand) | 3.2%         | 0.0%             | 0.0%                 | 2.5%           | 2.8%               | 5.4%          |
| Mine operation                    | 0.0%         | 0.0%             | 0.0%                 | 1.4%           | 0.0%               | 18.7%         |
| Electricity for concentrate       | 1.5%         | 0.8%             | 0.0%                 | 1.8%           | 0.6%               | 9.8%          |
| Chemicals for beneficiation       | 4.1%         | 0.0%             | 0.0%                 | 3.2%           | 2.4%               | 1.6%          |
| Reductants                        | 0.0%         | 0.0%             | 0.0%                 | 24.1%          | 22.9%              | 3.2%          |
| Chemicals                         | 24.8%        | 15.5%            | 36.6%                | 23.6%          | 3.9%               | 0.0%          |
| Electricity                       | 18.9%        | 8.3%             | 0.0%                 | 2.2%           | 21.3%              | 13.3%         |
| Thermal energy                    | 0.7%         | 1.1%             | 0.0%                 | 16.6%          | 6.0%               | 8.4%          |
| Process emissions                 | 0.0%         | 5.5%             | 32.2%                | 0.0%           | 7.3%               | 30.7%         |
| Transportation                    | 0.0%         | 0.0%             | 0.0%                 | 3.1%           | 2.1%               | 0.0%          |
| Inert waste treatment             | 0.0%         | 0.0%             | 3.0%                 | 0.0%           | 0.0%               | 0.0%          |
| Electricity for sulfate refining  | 1.8%         | 5.4%             | 0.4%                 | 0.6%           | 6.2%               | 3.9%          |
| Chemicals for sulfate refining    | 6.1%         | 41.7%            | 27.3%                | 2.5%           | 2.5%               | 1.4%          |
| Heat for sulfate refining         | 6.9%         | 0.7%             | 0.5%                 | 2.8%           | 2.8%               | 1.2%          |
| Sulfate refining direct emissions | 0.0%         | 0.0%             | 0.0%                 | 0.0%           | 0.0%               | 0.0%          |

|                           |      |      |      |      |      |      |
|---------------------------|------|------|------|------|------|------|
| Other (factory, nitrogen) | 0.0% | 0.0% | 0.0% | 0.0% | 1.1% | 1.3% |
|---------------------------|------|------|------|------|------|------|

Table 26: Underlying data of Figure 5

| contributor                        | HPAL-sulfur | HPAL-coal | RKEF-NPI | GLO<br>ecoinvent |
|------------------------------------|-------------|-----------|----------|------------------|
| Mobile equipment energy            | 1.28        | 1.28      | 1.35     | 0.00             |
| Explosives                         | 0.32        | 0.32      | 0.11     | 0.21             |
| Electricity for open-pit mining    | 0.11        | 0.11      | 0.34     | 0.00             |
| Energy for mine operation          | 0.00        | 0.00      | 0.00     | 3.55             |
| Other (EG, lubricating oil, sand)  | 0.00        | 0.00      | 0.00     | 1.02             |
| Electricity for concentrate        | 1.81        | 1.81      | 0.00     | 1.87             |
| Chemicals for beneficiation        | 0.00        | 0.00      | 0.00     | 0.31             |
| Char and hard coal                 | 0.00        | 0.00      | 43.84    | 0.60             |
| Chemicals                          | 5.55        | 5.55      | 0.00     | 0.00             |
| Electricity and acid for HPAL      | 1.73        | 19.56     | 0.00     | 0.00             |
| Electricity                        | 0.00        | 0.00      | 40.76    | 2.53             |
| Thermal energy                     | 0.00        | 0.00      | 4.67     | 1.60             |
| Process direct emissions           | 6.60        | 6.60      | 0.00     | 5.84             |
| Electricity for sulfate refining   | 3.09        | 3.09      | 44.17    | 0.74             |
| Chemicals for sulfate refining     | 0.98        | 0.98      | 1.45     | 0.26             |
| Heat for sulfate refining          | 0.11        | 0.11      | 0.19     | 0.23             |
| Sulfate refining process emissions | 0.06        | 0.06      | 2.68     | 0.00             |
| Other (factory, nitrogen)          | 0.00        | 0.00      | 0.00     | 0.26             |

The same data now processed in percentage form is presented in Table 27.

Table 27: Underlying data of Figure 5 in percentage form

| contributor                       | HPAL-sulfur | HPAL-coal | RKEF-NPI | GLO<br>ecoinvent |
|-----------------------------------|-------------|-----------|----------|------------------|
| Mobile equipment energy           | 5.9%        | 3.2%      | 1.0%     | 0.0%             |
| Explosives                        | 1.5%        | 0.8%      | 0.1%     | 1.1%             |
| Electricity for open-pit mining   | 0.5%        | 0.3%      | 0.2%     | 0.0%             |
| Energy for mine operation         | 0.0%        | 0.0%      | 0.0%     | 18.7%            |
| Other (EG, lubricating oil, sand) | 0.0%        | 0.0%      | 0.0%     | 5.4%             |
| Electricity for concentrate       | 8.4%        | 4.6%      | 0.0%     | 9.8%             |
| Chemicals for beneficiation       | 0.0%        | 0.0%      | 0.0%     | 1.6%             |
| Char and hard coal                | 0.0%        | 0.0%      | 31.4%    | 3.2%             |
| Chemicals                         | 25.6%       | 14.1%     | 0.0%     | 0.0%             |
| Electricity and acid for HPAL     | 8.0%        | 49.6%     | 0.0%     | 0.0%             |
| Electricity                       | 0.0%        | 0.0%      | 29.2%    | 13.3%            |
| Thermal energy                    | 0.0%        | 0.0%      | 3.3%     | 8.4%             |
| Process direct emissions          | 30.5%       | 16.7%     | 0.0%     | 30.7%            |
| Electricity for sulfate refining  | 14.3%       | 7.8%      | 31.7%    | 3.9%             |

|                                    |      |      |      |      |
|------------------------------------|------|------|------|------|
| Chemicals for sulfate refining     | 4.5% | 2.5% | 1.0% | 1.4% |
| Heat for sulfate refining          | 0.5% | 0.3% | 0.1% | 1.2% |
| Sulfate refining process emissions | 0.3% | 0.1% | 1.9% | 0.0% |
| Other (factory, nitrogen)          | 0.0% | 0.0% | 0.0% | 1.3% |

Underlying data supporting the discussion in Results section 3.4 is presented below.

*Table 28: Equivalent distances supporting the discussion in Results section 3.4*

| Processing pathway   | Embodied energy in nickel content of EV battery cells (kWh) | Equivalent distance for energy (km) | Embodied carbon in nickel content of EV battery cells (kgCO <sub>2</sub> ) | Equivalent distance for CO <sub>2</sub> (km) |
|----------------------|-------------------------------------------------------------|-------------------------------------|----------------------------------------------------------------------------|----------------------------------------------|
| POX leaching         | 7,385                                                       | 71,340                              | 159                                                                        | 647                                          |
| Bioheap leaching     | 4,640                                                       | 44,820                              | 249                                                                        | 1,011                                        |
| Tailings bioleaching | 1,161                                                       | 11,218                              | 311                                                                        | 1,263                                        |
| Flash smelting       | 11,719                                                      | 113,202                             | 391                                                                        | 1,589                                        |
| HPAL                 | 9,374                                                       | 90,549                              | 712                                                                        | 2,891                                        |
| RKEF-NPI             | 87,941                                                      | 849,509                             | 4,605                                                                      | 18,699                                       |

Underlying data for the generation of Figure 6 is presented in Table 29.

*Table 29: Underlying data of Figure 6's subplots*

| Impact category | POX leaching | Bioheap leaching | Tailings bioleaching | Smelting ecoinvent | HPAL  | RKEF-NPI |
|-----------------|--------------|------------------|----------------------|--------------------|-------|----------|
| GWP-l           | -74%         | -59%             | -45%                 | -36%               | 17%   | 664%     |
| GWP-s           | -74%         | -60%             | -47%                 | -37%               | 12%   | 632%     |
| FNEU            | -82%         | -52%             | -58%                 | -56%               | -51%  | 393%     |
| FAP             | -99%         | -98%             | -99%                 | -73%               | -94%  | -87%     |
| FETP            | -46%         | -96%             | -96%                 | -26%               | 415%  | -42%     |
| FEP             | -98%         | -97%             | -97%                 | -96%               | -86%  | -95%     |
| HTP-c           | -44%         | -92%             | -90%                 | -9%                | 7735% | 114%     |
| HTP-nc          | -79%         | -96%             | -95%                 | -71%               | -59%  | 23%      |
| IR              | -97%         | -19%             | -48%                 | -85%               | -95%  | -88%     |
| LU-o            | 5%           | -89%             | -89%                 | -62%               | -53%  | 6%       |
| LU-t            | -49%         | 13%              | -90%                 | -68%               | 123%  | 171%     |
| MEP             | -82%         | -73%             | -85%                 | -81%               | -79%  | 15%      |
| MRU             | -9%          | -63%             | -7%                  | 16%                | -43%  | -20%     |
| ODP             | -65%         | 52%              | -22%                 | -70%               | -2%   | 66%      |
| PMF             | -81%         | -66%             | -81%                 | 210%               | -14%  | 1424%    |
| POF             | -81%         | -44%             | -81%                 | 8%                 | -37%  | 206%     |
| TAP             | -99%         | -97%             | -98%                 | -61%               | -91%  | -81%     |
| WU              | -75%         | -68%             | -41%                 | -88%               | -87%  | -73%     |

Raw LCIA data before normalization with ecoinvent's global (GLO) nickel sulfate dataset's results is presented in Table 30.

Table 30: IMPACT WORLD+ v.1.29 midpoint results

| Impact category                                                                         | POX leaching | Bioheap leaching | Tailings bioleaching | Smelting ecoinvent | HPAL     | RKEF-NPI | GLO ecoinvent |
|-----------------------------------------------------------------------------------------|--------------|------------------|----------------------|--------------------|----------|----------|---------------|
| <b>Climate change, long term</b><br>(kgCO <sub>2eq</sub> )                              | 4.75E+00     | 7.33E+00         | 9.89E+00             | 1.14E+01           | 2.10E+01 | 1.37E+02 | 1.80E+01      |
| <b>Climate change, short term</b><br>(kgCO <sub>2eq</sub> )                             | 5.11E+00     | 7.84E+00         | 1.04E+01             | 1.22E+01           | 2.18E+01 | 1.43E+02 | 1.95E+01      |
| <b>Fossil and nuclear energy use</b><br>(MJ deprived)                                   | 5.54E+01     | 1.45E+02         | 1.27E+02             | 1.33E+02           | 1.47E+02 | 1.49E+03 | 3.02E+02      |
| <b>Freshwater acidification</b><br>(kgSO <sub>2eq</sub> )                               | 3.70E-13     | 9.26E-13         | 5.23E-13             | 1.10E-11           | 2.41E-12 | 5.15E-12 | 4.02E-11      |
| <b>Freshwater ecotoxicity</b><br>(CTUe)                                                 | 1.68E+06     | 1.13E+05         | 1.36E+05             | 2.30E+06           | 1.60E+07 | 1.80E+06 | 3.11E+06      |
| <b>Freshwater eutrophication</b><br>(kgPO <sub>4</sub> P-lim <sub>eq</sub> )            | 1.03E-05     | 1.36E-05         | 1.36E-05             | 1.89E-05           | 6.79E-05 | 2.18E-05 | 4.74E-04      |
| <b>Human toxicity cancer</b><br>(CTUh)                                                  | 3.63E-06     | 4.93E-07         | 6.17E-07             | 5.82E-06           | 5.04E-04 | 1.38E-05 | 6.43E-06      |
| <b>Human toxicity non cancer</b><br>(CTUh)                                              | 5.16E-06     | 9.70E-07         | 1.29E-06             | 7.24E-06           | 1.02E-05 | 3.03E-05 | 2.47E-05      |
| <b>Ionizing radiations</b><br>(Bq C-14 <sub>eq</sub> )                                  | 1.30E+01     | 3.28E+02         | 2.09E+02             | 5.91E+01           | 1.87E+01 | 4.85E+01 | 4.03E+02      |
| <b>Land occupation, biodiversity</b><br>(m <sup>2</sup> arable land <sub>eq</sub> .yr)  | 4.07E-01     | 4.14E-02         | 4.44E-02             | 1.46E-01           | 1.81E-01 | 4.11E-01 | 3.87E-01      |
| <b>Land transformation, biodiversity</b><br>(m <sup>2</sup> arable land <sub>eq</sub> ) | 3.57E-03     | 7.85E-03         | 6.78E-04             | 2.24E-03           | 1.55E-02 | 1.89E-02 | 6.97E-03      |
| <b>Marine eutrophication</b><br>(kg N N-lim <sub>eq</sub> )                             | 9.21E-04     | 1.43E-03         | 7.82E-04             | 1.00E-03           | 1.10E-03 | 6.00E-03 | 5.24E-03      |
| <b>Mineral resources use</b><br>(kg deprived)                                           | 1.91E-01     | 7.85E-02         | 1.96E-01             | 2.44E-01           | 1.20E-01 | 1.69E-01 | 2.10E-01      |
| <b>Ozone Layer Depletion</b><br>(kg CFC-11 <sub>eq</sub> )                              | 1.35E-07     | 5.92E-07         | 3.05E-07             | 1.16E-07           | 3.81E-07 | 6.47E-07 | 3.91E-07      |
| <b>Particulate matter formation</b><br>(kg PM2.5 <sub>eq</sub> )                        | 4.70E-03     | 8.37E-03         | 4.80E-03             | 7.64E-02           | 2.13E-02 | 3.76E-01 | 2.47E-02      |
| <b>Photochemical oxidant formation</b><br>(kg NMVOC <sub>eq</sub> )                     | 2.83E-02     | 8.34E-02         | 2.81E-02             | 1.61E-01           | 9.42E-02 | 4.57E-01 | 1.49E-01      |
| <b>Terrestrial acidification</b><br>(kg SO <sub>2eq</sub> )                             | 2.24E-07     | 5.54E-07         | 3.21E-07             | 6.64E-06           | 1.47E-06 | 3.19E-06 | 1.71E-05      |
| <b>Water scarcity</b><br>(m <sup>3</sup> world <sub>eq</sub> )                          | 3.00E+01     | 3.86E+01         | 7.05E+01             | 1.46E+01           | 1.51E+01 | 3.25E+01 | 1.20E+02      |

Alternatives to Figure 6 using IMPACT WORLD+ version 2.01 and ecoinvent - ReCiPe 2016 v1.03, midpoint (H) impact assessment methods are presented below (Figure S 1 and Figure S 2 respectively).

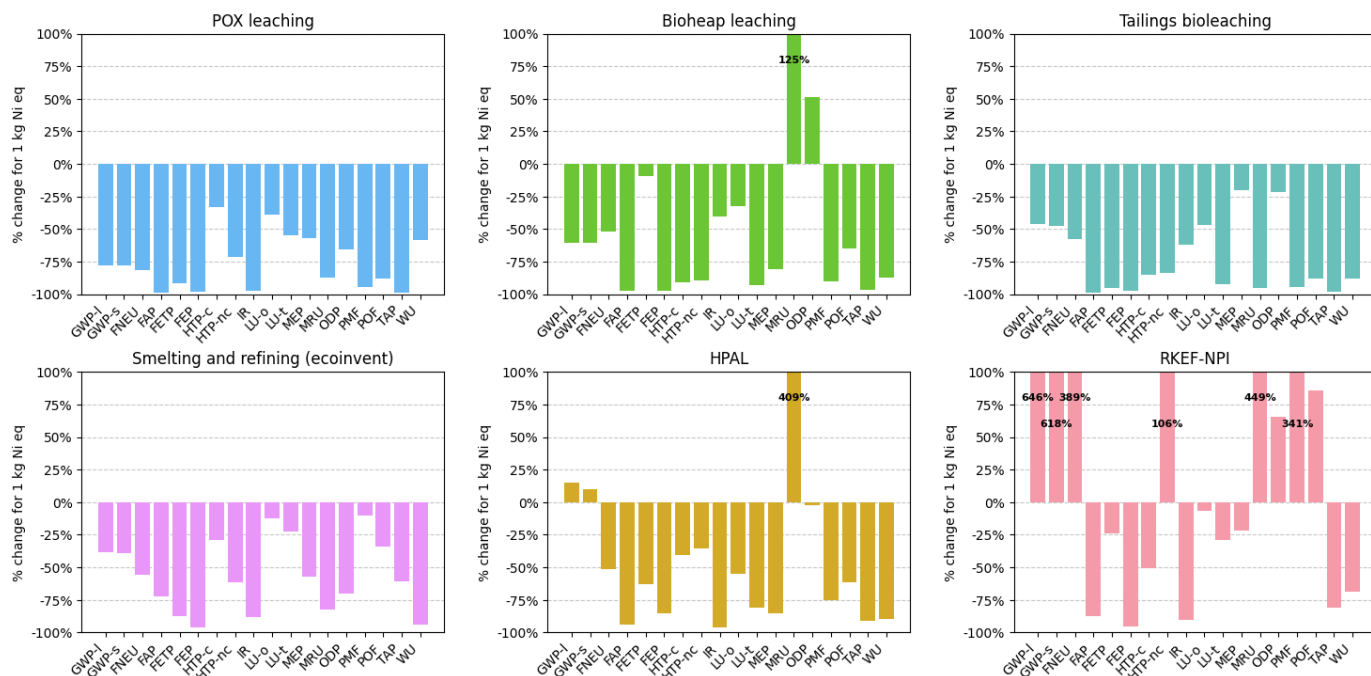

Figure S 1: Alternative to Figure 6, using version 2.01 of IMPACT WORLD+.

Values are normalized as percentage change from the value obtained with the global nickel sulfate dataset in ecoinvent, for 1 kg Ni<sub>eq</sub>. Abbreviations: GWP-l: Climate change, long term (kgCO<sub>2eq</sub>), GWP-s: Climate change, short term (kgCO<sub>2eq</sub>), FNEU: Fossil and nuclear energy use (MJ deprived), FAP: Freshwater acidification (kgSO<sub>2eq</sub>), FETP: Freshwater ecotoxicity (CTUe), FEP: Freshwater eutrophication (kgPO<sub>4</sub> P-lim<sub>eq</sub>), HTP-c: Human toxicity cancer (CTUh), HTP-nc: Human toxicity non cancer (CTUh), IR: Ionizing radiations (Bq C-14<sub>eq</sub>), LU-o: Land occupation, biodiversity (m<sup>2</sup> arable land eq .yr), LU-t: Land transformation, biodiversity (m<sup>2</sup> arable land<sub>eq</sub>), MEP: Marine eutrophication (kg N N-lim<sub>eq</sub>), MRU: Mineral resources use (kg deprived), ODP: Ozone Layer Depletion (kg CFC-11<sub>eq</sub>), PMF: Particulate matter formation (kg PM2.5<sub>eq</sub>), POF: Photochemical oxidant formation (kg NMVOC<sub>eq</sub>), TAP: Terrestrial acidification (kg SO<sub>2eq</sub>), WU: Water scarcity (m<sup>3</sup> world<sub>eq</sub>).

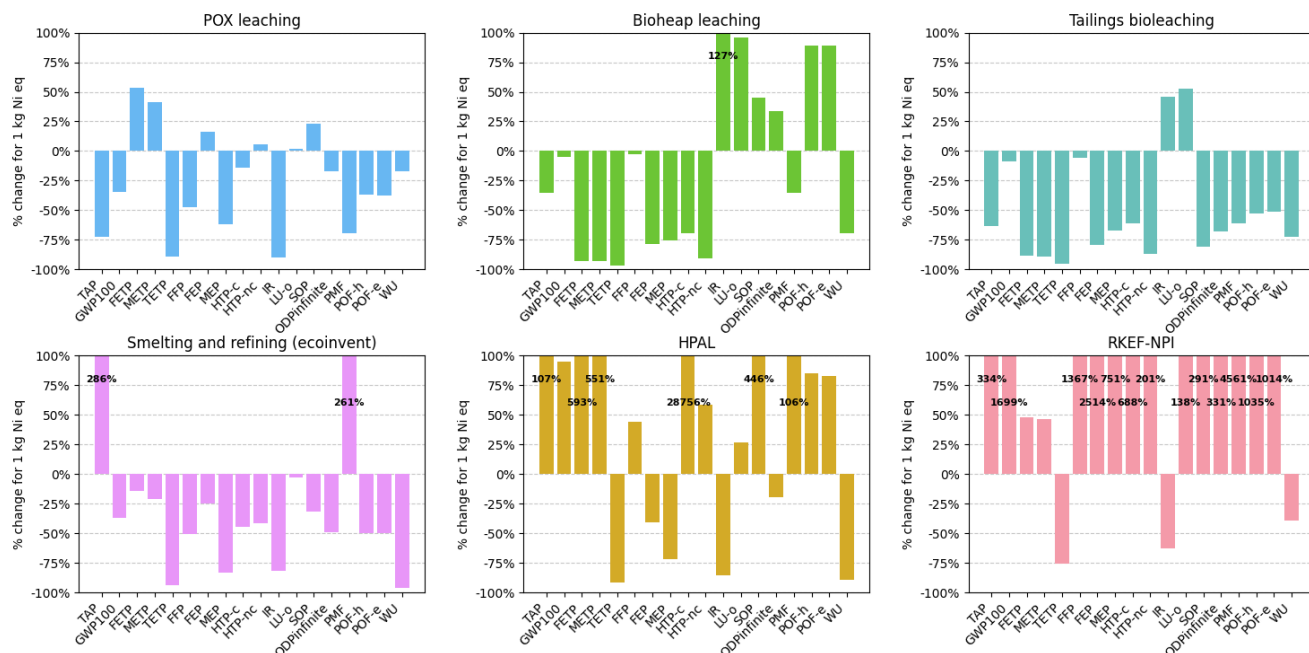

Figure S 2: Alternative to Figure 6, using ReCiPe 2016(H) impact assessment method.

Values are normalized as percentage change from the value obtained with the global nickel sulfate dataset in ecoinvent, for 1 kg Ni<sub>eq</sub>. Abbreviations: TAP: terrestrial acidification potential (kgSO<sub>2eq</sub>), GWP100: global warming potential (kgCO<sub>2eq</sub>), FETP: freshwater ecotoxicity potential (kg 1,4-DCB<sub>eq</sub>), METP: marine ecotoxicity potential (kg 1,4-DCB<sub>eq</sub>), TETP: terrestrial ecotoxicity potential (kg 1,4-DCB<sub>eq</sub>), FFP: fossil fuel potential (kg oil<sub>eq</sub>), FEP: freshwater eutrophication potential (kg P<sub>eq</sub>), MEP: marine eutrophication potential (kg N<sub>eq</sub>), HTP-c: carcinogenic - human toxicity potential (kg 1,4-DCB<sub>eq</sub>), HTP-nc: non-carcinogenic - human toxicity potential (kg 1,4-DCB<sub>eq</sub>), IR: ionising radiation potential (kBq Co-60<sub>eq</sub>), LU-o: agricultural land occupation (m<sup>2</sup>\*a crop<sub>eq</sub>), SOP: surplus ore potential (kg Cu<sub>eq</sub>), ODPinfinite: ozone depletion potential (kg CFC-11<sub>eq</sub>), PMF: particulate matter formation potential (kg PM2.5<sub>eq</sub>), POF-h: photochemical oxidant formation potential, humans (kg NO<sub>xeq</sub>), POF-e: photochemical oxidant formation potential, ecosystems (kg NO<sub>xeq</sub>), WU: water consumption potential (m<sup>3</sup>)

## References

- 1 Norgate, T. & Jahanshahi, S. in *5th Australian conference on life cycle assessment: achieving business benefits from managing life cycle impacts* (2006).
- 2 Wernet, G. *et al.* The ecoinvent database version 3 (part I): overview and methodology. *The International Journal of Life Cycle Assessment* **21**, 1218-1230, doi:10.1007/s11367-016-1087-8 (2016).
- 3 MiningTechnology. *Raglan Nickel Copper Mine, Quebec*, <<https://www.mining-technology.com/projects/raglan/?cf-view>> (2010).
- 4 UWaterloo. *The Cu-Ni-Co deposit at Voisey's Bay, Labrador*, <<https://uwaterloo.ca/wat-on-earth/news/cu-ni-co-deposit-voiseys-bay-labrador>> (2024).
- 5 Vale. *Environmental Impact Statement Long Harbour Commercial Nickel Processing Plant*, <<https://www.gov.nl.ca/ecc/projects/project-1243/>> (2008).
- 6 Gillespie, R., Quinn, J., Walters, A., Moore, A. & Radziszewski, P. *Design, Commissioning, Start-Up and Performance of Vale's Long Harbour Stirred Media Detritor Ultrafine Grinding Circuit*, (2016).
- 7 Tijsseling, L. & Whattoff, P. Product carbon footprint of nickel sulfate hexahydrate production. (2023).
- 8 Dry, M., Vaughan, J. & Hawker, W. Environmental evaluation of making nickel sulphate. (2019).
- 9 Umweltbundesamt. *Sulphuric acid production*, <[https://www.umweltbundesamt.at/fileadmin/site/themen/industrie/sulphuric\\_acid\\_production-installation\\_1.pdf](https://www.umweltbundesamt.at/fileadmin/site/themen/industrie/sulphuric_acid_production-installation_1.pdf)> (2017).
- 10 Naukkarinen, M. Life cycle assessment study of a sulfuric acid manufacturing process in the chemical pulping industry. (2023).
- 11 Terrafame. *Permit PSAVI/2461/2017: Terrafame Oy's Sotkamo mining and metal production environmental and water management permit, as well as the soil and environmental permit for the extraction, extraction and crushing of rock material (translated from finnish) Terrafame Oy:n Sotkamon kaivos- ja metallituotannon ympäristö- ja vesitalouslupa sekä kalliokiviaineksen ottoa, louhintaa ja murskausta koskeva maa-aines- ja ympäristölupa*, <<https://ylupa.avi.fi/fi-FI>> (2022).
- 12 Terrafame. *Permit PSAVI/3626/2019: Environmental permit of the battery chemical factory, Sotkamo (translated from finnish) Akkukemikaalitehtaan ympäristölupa, Sotkamo*, <<https://ylupa.avi.fi/fi-FI>> (2021).
- 13 Johnson, D. B., Bryan, C. G., Schlömann, M. & Roberto, F. F. *Biomining Technologies*. (Springer, 2023).
- 14 Terrafame. *Creating responsible battery value chain - sustainability review 2021*, <<https://www.terrafame.com/media/mediamateriaali/raportointi/kestavan-kehityksen-katsaukset/eng/terrafame-sustainability-review-2020.pdf>> (2021).
- 15 Di Maria, A., Khoshkhoo, M., Sand, A. & Van Acker, K. Towards sustainable resource valorization: A life cycle sustainability assessment of metals recovery from sulfidic mining residues in Sweden. *Resources, Conservation and Recycling* **204**, 107513, doi:<https://doi.org/10.1016/j.resconrec.2024.107513> (2024).
- 16 Wei, W., Samuelsson, P. B., Tilliander, A., Gyllenram, R. & Jönsson, P. G. Energy Consumption and Greenhouse Gas Emissions of Nickel Products. *Energies* **13**, 5664 (2020).
- 17 Khoo, J. Z., Haque, N., Woodbridge, G., McDonald, R. & Bhattacharya, S. A life cycle assessment of a new laterite processing technology. *Journal of Cleaner Production* **142**, 1765-1777, doi:<https://doi.org/10.1016/j.jclepro.2016.11.111> (2017).
